# Supplementary material for: Sirtuin 5 levels are limiting in preserving cardiac function and suppressing fibrosis in response to pressure overload
Source: bioRxiv or medRxiv preprint supplement (doi:10.1101/2021.06.15.448619), 2021-06-16
Supplement: Supplementary file [file media-1.pdf]

# Supplemental Figure 1

**A**

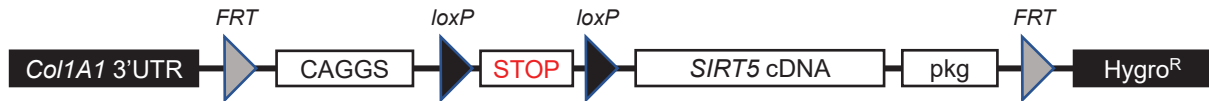

**B**

| WT male, SIRT5OE female |     |         |       |          |         |
|-------------------------|-----|---------|-------|----------|---------|
|                         | WT  | SIRT5OE | Total | $\chi^2$ | p-value |
| <b>Males</b>            | 73  | 77      | 150   | 2.09     | 0.55    |
| <b>Females</b>          | 74  | 61      | 135   |          |         |
| <b>Total</b>            | 147 | 138     | 285   |          |         |

  

| SIRT5OE male, WT female |    |    |       |          |         |
|-------------------------|----|----|-------|----------|---------|
|                         | WT | OE | Total | $\chi^2$ | p-value |
| <b>Males</b>            | 38 | 25 | 63    | 5.07     | 0.17    |
| <b>Females</b>          | 42 | 41 | 83    |          |         |
| <b>Total</b>            | 80 | 66 | 146   |          |         |

  

| Combined       |     |         |       |          |         |
|----------------|-----|---------|-------|----------|---------|
|                | WT  | SIRT5OE | Total | $\chi^2$ | p-value |
| <b>Males</b>   | 111 | 102     | 213   | 1.32     | 0.72    |
| <b>Females</b> | 116 | 102     | 218   |          |         |
| <b>Total</b>   | 227 | 204     | 431   |          |         |

**Supplemental Figure 1. Generation of SIRT5OE mice.** A, cassette containing a constitutive CAGGS promoter, a transcriptional flox-STOP-flox, followed by the SIRT5 cDNA was inserted into the collagen1 A1 (Col1A1) 3'UTR by FLP recombination. B, number of male and female mice born per WT or SIRT5OE litter.

# Supplemental Figure 2

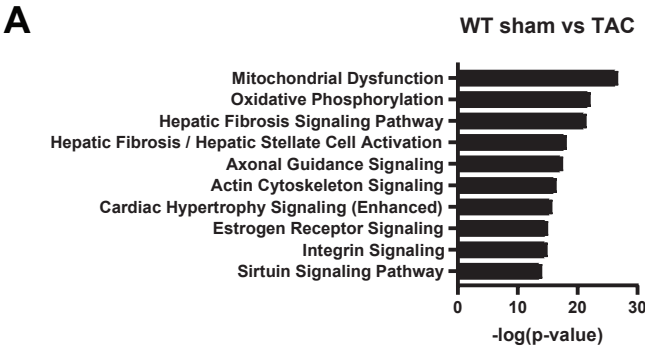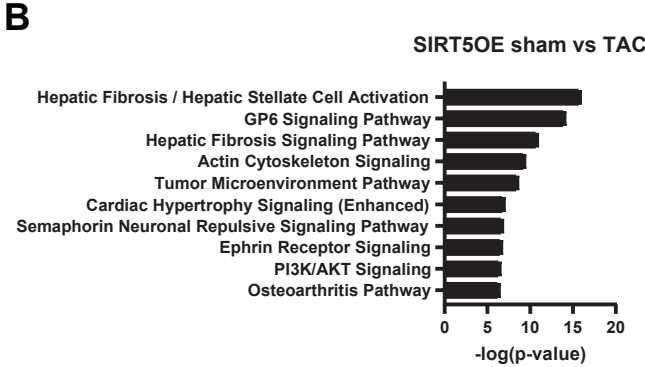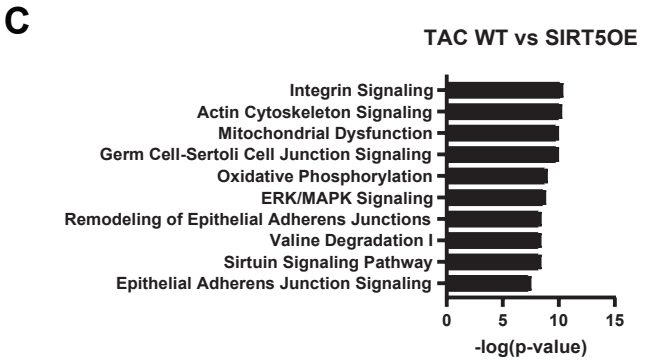

**Supplemental Figure 2.** Top 10 IPA pathways, sorted on significance, enriched by differentially expressed genes in each labelled comparison.

# Supplemental Figure 3

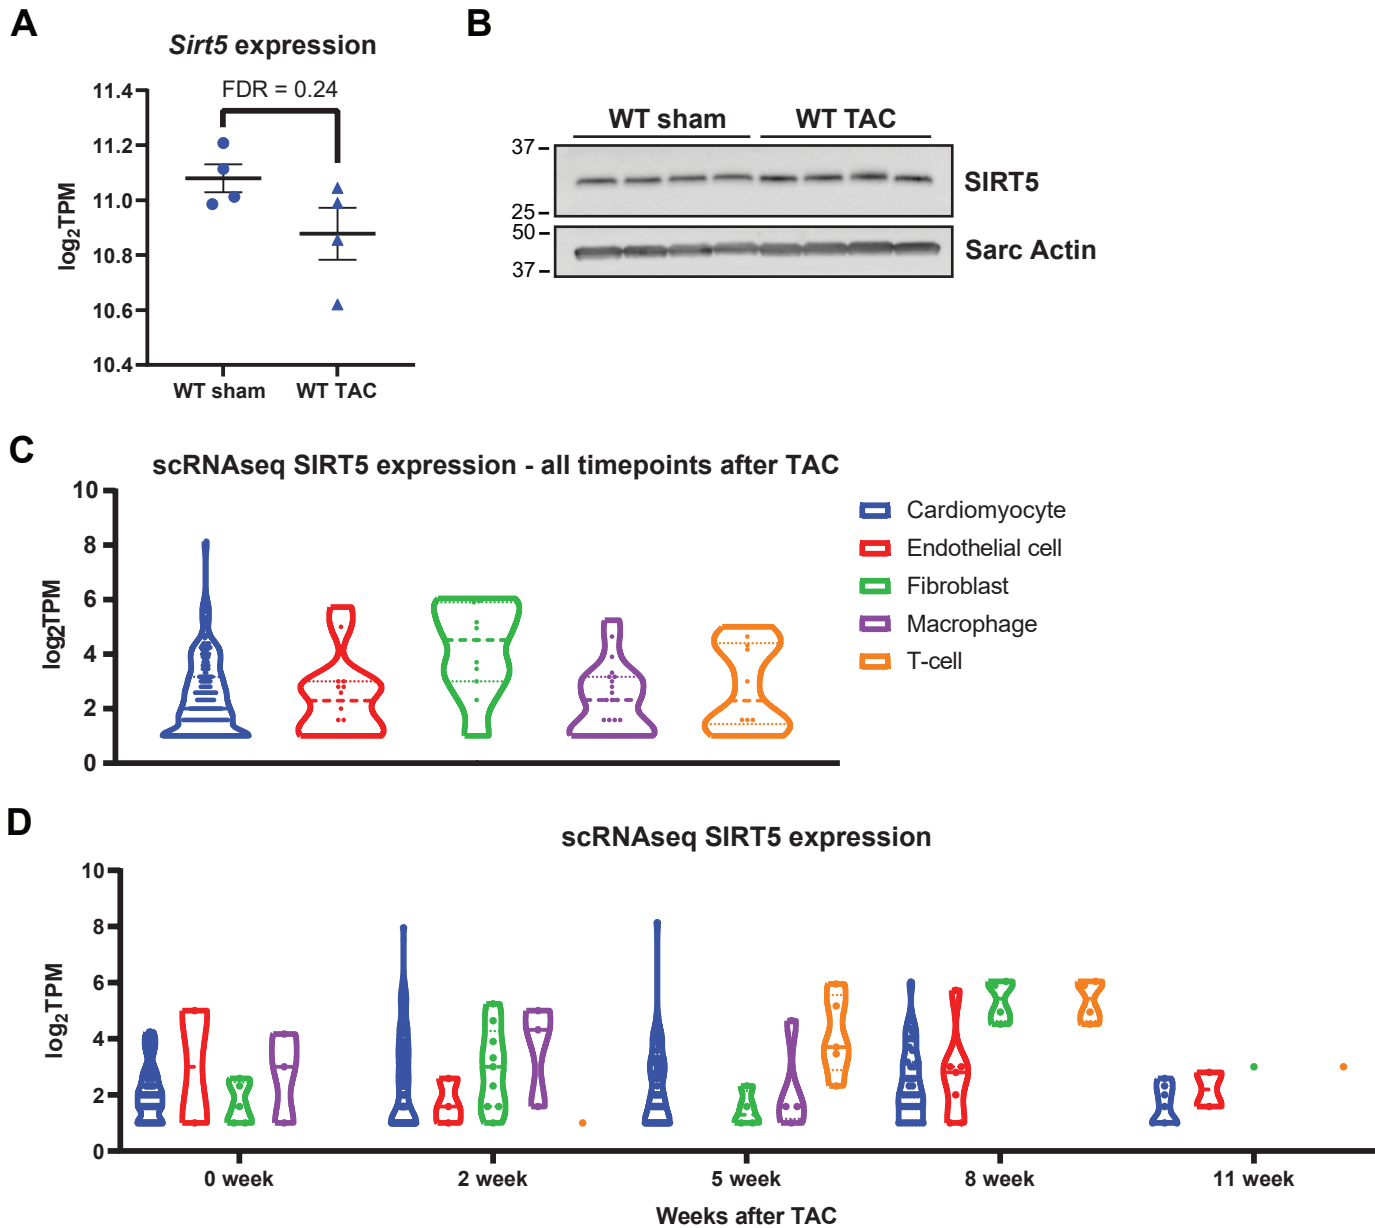

**Supplemental Figure 3. SIRT5 expression in bulk heart tissue and specific cardiac cell populations.** A, *Sirt5* expression in bulk heart WT sham and WT TAC samples. B, SIRT5 protein levels in WT sham and TAC heart lysates. C, *Sirt5* expression in five major cardiac cell types using single-cell data generated by Ren et. al. Only cells with at least 2 reads of *Sirt5* were graphed. D, *Sirt5* expression in single-cell RNA-seq across 5 different time-points through 11 weeks of pressure overload.

| <b>Supplemental Table 1. Two-way ANOVA analyses of metabolites in Figure 6B-D</b> |                        |                   |                           |
|-----------------------------------------------------------------------------------|------------------------|-------------------|---------------------------|
|                                                                                   | <b>Genotype Effect</b> | <b>TAC Effect</b> | <b>Interaction Effect</b> |
| <b>NAD<sup>+</sup></b>                                                            | 0.136                  | 0.005*            | 0.740                     |
| <b>NADH</b>                                                                       | 0.044*                 | 0.522             | 0.275                     |
| <b>NAD<sup>+</sup>/NADH</b>                                                       | 0.074 <sup>+</sup>     | 0.002*            | 0.599                     |
| <b>Glucose 6-phosphate</b>                                                        | 0.584                  | 0.888             | 0.705                     |
| <b>Fructose 6-phosphate</b>                                                       | 0.694                  | 0.945             | 0.712                     |
| <b>Fructose 1,6-bisphosphate</b>                                                  | 0.504                  | 0.598             | 0.850                     |
| <b>Dihydroxyacetone phosphate</b>                                                 | 0.326                  | 0.555             | 0.321                     |
| <b>Glyceraldehyde 3-phosphate</b>                                                 | 0.197                  | 0.235             | 0.548                     |
| <b>2-phosphoglycerate</b>                                                         | 0.133                  | 0.940             | 0.306                     |
| <b>Phosphoenolpyruvate</b>                                                        | 0.825                  | 0.696             | 0.832                     |
| <b>Pyruvate</b>                                                                   | 0.399                  | 0.962             | 0.826                     |
| <b>Citrate/Isocitrate</b>                                                         | 0.532                  | 0.345             | 0.441                     |
| <b>Aconitate</b>                                                                  | 0.840                  | 0.005*            | 0.263                     |
| <b><math>\alpha</math>-ketoglutarate</b>                                          | 0.460                  | <0.001*           | 0.065 <sup>+</sup>        |
| <b>Succinate</b>                                                                  | 0.069 <sup>+</sup>     | 0.002*            | 0.183                     |
| <b>Malate</b>                                                                     | 0.058 <sup>+</sup>     | <0.001*           | 0.638                     |
| <b>FAD</b>                                                                        | 0.049*                 | <0.001*           | 0.940                     |

## **Supplemental Table Legends**

**Supplemental Table 1.** Two-way ANOVA analyses results of all metabolites plotted in Figure 6B-D. Significance markers: (\*)  $p < 0.05$ , (+)  $p < 0.1$ .

**Supplemental Table 2.** Median-centered data from LC-MS/MS metabolite profiling in WT sham, WT TAC, SIRT5OE sham, and SIRT5OE TAC hearts. P-value was calculated using a two-tailed t-test.

**Supplemental Table 3.** DESeq2 output of differential gene expression of the RNA-seq data. Samples in each comparison are labelled on the spreadsheet name. Padj (p-value adjusted for multiple comparisons) were used to determine significance.
